# Supplementary material for: Mixed-Species Stands Improve the Coordination between Leaf and Fine Root Traits in a Common Garden Experiment
Source: MDPI journal article supplement (doi:10.3390/f15050744), 2024-04-24
Supplement: s1 [file s1]

## *Supplementary Material*

**Table S1. Results of statistical analyses for leaf traits.**

| Leaf traits | Parameters | F value | P         | Sig. | Parameters | F value | P         | Sig. | Parameters | F value | P         | Sig. |
|-------------|------------|---------|-----------|------|------------|---------|-----------|------|------------|---------|-----------|------|
| CHI         | RD         | 5.89    | 0.0156    | *    | LH         | 86.278  | 2E-16     | *    | MT         | 62.217  | 1.86E-14  | *    |
| CHI         | SR         | 1.218   | 0.3024    | ns   | SR         | 0.927   | 0.427     | ns   | SR         | 0.716   | 0.543     | ns   |
| CHI         | RD*SR      | 3.511   | 0.0152    | *    | LH*SR      | 0.949   | 0.416     | ns   | MT*SR      | 2.83    | 0.038     | *    |
| SLA         | RD         | 76.323  | 2E-16     | *    | LH         | 407.461 | 2E-16     | *    | MT         | 292.579 | 2E-16     | *    |
| SLA         | SR         | 8.129   | 0.0000269 | *    | SR         | 17.845  | 4.95E-11  | *    | SR         | 7.573   | 0.0000578 | *    |
| SLA         | RD*SR      | 1.157   | 0.326     | ns   | LH*SR      | 3.337   | 0.0192    | *    | MT*SR      | 0.332   | 0.082     | ns   |
| LA          | RD         | 9.096   | 0.002688  | *    | LH         | 35.439  | 4.88E-09  | *    | MT         | 5.777   | 4.15E-09  | *    |
| LA          | SR         | 6.457   | 0.000269  | *    | SR         | 5.317   | 0.00129   | *    | SR         | 4.37    | 0.00473   | *    |
| LA          | RD*SR      | 1.201   | 0.308858  | ns   | LH*SR      | 0.457   | 0.71224   | ns   | MT*SR      | 1.306   | 0.27185   | ns   |
| LDMC        | RD         | 71.694  | 2.65E-16  | *    | LH         | 213.724 | 2E-16     | *    | MT         | 693.306 | 2E-16     | *    |
| LDMC        | SR         | 5.66    | 0.000806  | *    | SR         | 9.075   | 0.0000073 | *    | SR         | 4.137   | 0.00649   | *    |
| LDMC        | RD*SR      | 0.623   | 0.600563  | ns   | LH*SR      | 1.272   | 0.283     | s    | MT*SR      | 1.531   | 0.20553   | ns   |
| LN          | RD         | 6.25    | 0.01273   | *    | LH         | 62.484  | 1.65E-14  | *    | MT         | 0.632   | 0.42711   | ns   |
| LN          | SR         | 3.981   | 0.00804   | *    | SR         | 4.694   | 0.00303   | *    | SR         | 4.299   | 0.00521   | *    |
| LN          | RD*SR      | 5.326   | 0.00128   | *    | LH*SR      | 5.121   | 0.00169   | *    | MT*SR      | 4.25    | 0.00557   | *    |
| LP          | RD         | 89.779  | 2E-16     | *    | LH         | 94.658  | 2E-16     | *    | MT         | 61.118  | 3.06E-14  | *    |
| LP          | SR         | 7.385   | 0.0000749 | *    | SR         | 8.032   | 0.0000307 | *    | SR         | 8.476   | 0.0000167 | *    |
| LP          | RD*SR      | 6.218   | 0.000374  | *    | LH*SR      | 1.546   | 0.202     | ns   | MT*SR      | 0.825   | 0.48      | ns   |

Note: The "ns" indicates no significant ( $P > 0.05$ ), whereas the " \* " indicates a significant difference ( $P < 0.05$ ) among different trait categories, species richness, and the interactions between trait categories and species richness (Tukey's HSD). Root depth (RD), species richness (SR), leaf habit (LH), mycorrhizal type (MT), chlorophyll (CHL), specific leaf area (SLA), leaf area (LA), leaf dry matter content (LDMC), leaf nitrogen (LN), and leaf phosphorus (LP).

**Table S2. Results of statistical analyses for absorptive root traits.**

| Absorptive root traits | Parameters | F value | P        | Sig. | Parameters | F value | P        | Sig. | Parameters | F value | P        | Sig. |
|------------------------|------------|---------|----------|------|------------|---------|----------|------|------------|---------|----------|------|
| DIA                    | RD         | 0.318   | 0.573    | ns   | LH         | 8.377   | 0.00408  | *    | MT         | 0.97    | 0.326    | ns   |
| DIA                    | SR         | 1.02    | 0.384    | ns   | SR         | 0.655   | 0.58026  | ns   | SR         | 1.01    | 0.389    | ns   |
| DIA                    | RD*SR      | 0.261   | 0.854    | ns   | LH*SR      | 2.215   | 0.08645  | ns   | MT*SR      | 0.215   | 0.886    | ns   |
| SRL                    | RD         | 6.261   | 0.012882 | *    | LH         | 2.572   | 0.10983  | ns   | MT         | 2.663   | 0.10376  | ns   |
| SRL                    | SR         | 7.102   | 0.000127 | *    | SR         | 7.049   | 0.000136 | *    | SR         | 7.242   | 0.000105 | *    |
| SRL                    | RD*SR      | 1.278   | 0.281941 | ns   | LH*SR      | 3.776   | 0.011022 | *    | MT*SR      | 2.77    | 0.041882 | *    |
| SRA                    | RD         | 4.836   | 0.0286   | *    | LH         | 0       | 0.99665  | ns   | MT         | 1.462   | 0.2277   | ns   |
| SRA                    | SR         | 3.378   | 0.0187   | *    | SR         | 3.966   | 0.00855  | *    | SR         | 3.499   | 0.0159   | *    |
| SRA                    | RD*SR      | 0.7     | 0.5529   | ns   | LH*SR      | 4.676   | 0.0033   | *    | MT*SR      | 1.709   | 0.1653   | ns   |
| RTD                    | RD         | 2.922   | 0.0884   | ns   | LH         | 2.783   | 0.09633  |      | MT         | 0.076   | 0.783    | ns   |
| RTD                    | SR         | 3.328   | 0.02     | *    | SR         | 3.955   | 0.00867  | *    | SR         | 3.253   | 0.0221   | *    |
| RTD                    | RD*SR      | 1.007   | 0.3901   | ns   | LH*SR      | 3.173   | 0.0246   | *    | MT*SR      | 0.291   | 0.8321   | ns   |
| RN                     | RD         | 1.415   | 0.235    | ns   | LH         | 9.135   | 0.00273  | *    | MT         | 2.074   | 0.151    | ns   |
| RN                     | SR         | 0.969   | 0.408    | ns   | SR         | 1.275   | 0.28314  | ns   | SR         | 1.327   | 0.266    | ns   |
| RN                     | RD*SR      | 0.559   | 0.642    | ns   | LH*SR      | 0.626   | 0.59892  | ns   | MT*SR      | 1.009   | 0.389    | ns   |
| RP                     | RD         | 6.615   | 0.0106   | *    | LH         | 1.841   | 0.1759   | ns   | MT         | 3.896   | 0.0493   | *    |
| RP                     | SR         | 3.435   | 0.0174   | *    | SR         | 3.818   | 0.0104   | *    | SR         | 3.021   | 0.0301   | *    |
| RP                     | RD*SR      | 1.788   | 0.1495   | ns   | LH*SR      | 2.72    | 0.0447   | *    | MT*SR      | 1.24    | 0.2953   | ns   |

Note: The "ns" indicates no significant ( $P > 0.05$ ), whereas the " \* " indicates a significant difference ( $P < 0.05$ ) among different trait categories, species richness, and the interactions between trait categories and species richness (Tukey's HSD). Root depth (RD), species richness (SR), leaf habit (LH), mycorrhizal type (MT), root diameter (DIA), specific root length (SRL), specific root surface area (SRA), root tissue density (RTD), root nitrogen (RN), and root phosphorus (RP).

**Table S3. Results of statistical analyses for transport root traits.**

| Transport root traits | Parameters | F value | P        | Sig. | Parameters | F value | P         | Sig. | Parameters | F value | P        | Sig. |
|-----------------------|------------|---------|----------|------|------------|---------|-----------|------|------------|---------|----------|------|
| DIA                   | RD         | 0.071   | 0.789559 | ns   | LH         | 0.23    | 0.6318119 | ns   | MT         | 0.105   | 0.745737 | ns   |
| DIA                   | SR         | 6.451   | 0.000304 | *    | SR         | 6.276   | 0.000385  | *    | SR         | 6.594   | 0.000251 | *    |
| DIA                   | RD*SR      | 0.397   | 0.755599 | ns   | LH*SR      | 1.257   | 0.289177  | ns   | MT*SR      | 0.73    | 0.534872 | ns   |
| SRL                   | RD         | 0.414   | 0.5206   | ns   | LH         | 0.77    | 0.3808    | ns   | MT         | 0.263   | 0.6085   | ns   |
| SRL                   | SR         | 3.233   | 0.0227   | *    | SR         | 2.904   | 0.0351    | *    | SR         | 3.271   | 0.0216   | *    |
| SRL                   | RD*SR      | 2.434   | 0.065    | ns   | LH*SR      | 0.879   | 0.4525    | ns   | MT*SR      | 0.5     | 0.6824   | ns   |
| SRA                   | RD         | 0.604   | 0.4377   | ns   | LH         | 0.408   | 0.5237    | ns   | MT         | 0.039   | 0.8437   | ns   |
| SRA                   | SR         | 3.255   | 0.0221   | *    | SR         | 3.206   | 0.0235    | *    | SR         | 3.253   | 0.0221   | *    |
| SRA                   | RD*SR      | 2.071   | 0.1041   | ns   | LH*SR      | 0.596   | 0.6182    | ns   | MT*SR      | 0.364   | 0.7793   | ns   |
| RTD                   | RD         | 0.079   | 0.77872  | ns   | LH         | 0.114   | 0.73607   | ns   | MT         | 0.075   | 0.7842   | ns   |
| RTD                   | SR         | 4.508   | 0.00414  | *    | SR         | 4.61    | 0.00361   | *    | SR         | 4.571   | 0.0038   | *    |
| RTD                   | RD*SR      | 1.176   | 0.31914  | ns   | LH*SR      | 3.105   | 0.02693   | *    | MT*SR      | 0.34    | 0.7963   | ns   |
| RN                    | RD         | 0.361   | 0.5481   | ns   | LH         | 1.826   | 0.1777    | ns   | MT         | 2.176   | 0.1413   | ns   |
| RN                    | SR         | 2.97    | 0.0322   | *    | SR         | 3.587   | 0.0142    | *    | SR         | 3.688   | 0.0124   | *    |
| RN                    | RD*SR      | 1.078   | 0.3588   | ns   | LH*SR      | 0.846   | 0.4698    | ns   | MT*SR      | 2.094   | 0.1011   | ns   |
| RP                    | RD         | 0.105   | 0.7464   | ns   | LH         | 0.202   | 0.6534    | ns   | MT         | 1.614   | 0.205    | ns   |
| RP                    | SR         | 2.406   | 0.0674   | ns   | SR         | 2.454   | 0.0634    | ns   | SR         | 2.203   | 0.0878   | ns   |
| RP                    | RD*SR      | 0.215   | 0.8858   | ns   | LH*SR      | 0.4041  | 0.4041    | ns   | MT*SR      | 0.662   | 0.5757   | ns   |

Note: The "ns" indicates no significant ( $P > 0.05$ ), whereas the " \* " indicates a significant difference ( $P < 0.05$ ) among different trait categories, species richness, and the interactions between trait categories and species richness (Tukey's HSD). Root depth (RD), species richness (SR), leaf habit (LH), mycorrhizal type (MT), root diameter (DIA), specific root length (SRL), specific root surface area (SRA), root tissue density (RTD), root nitrogen (RN), and root phosphorus (RP).

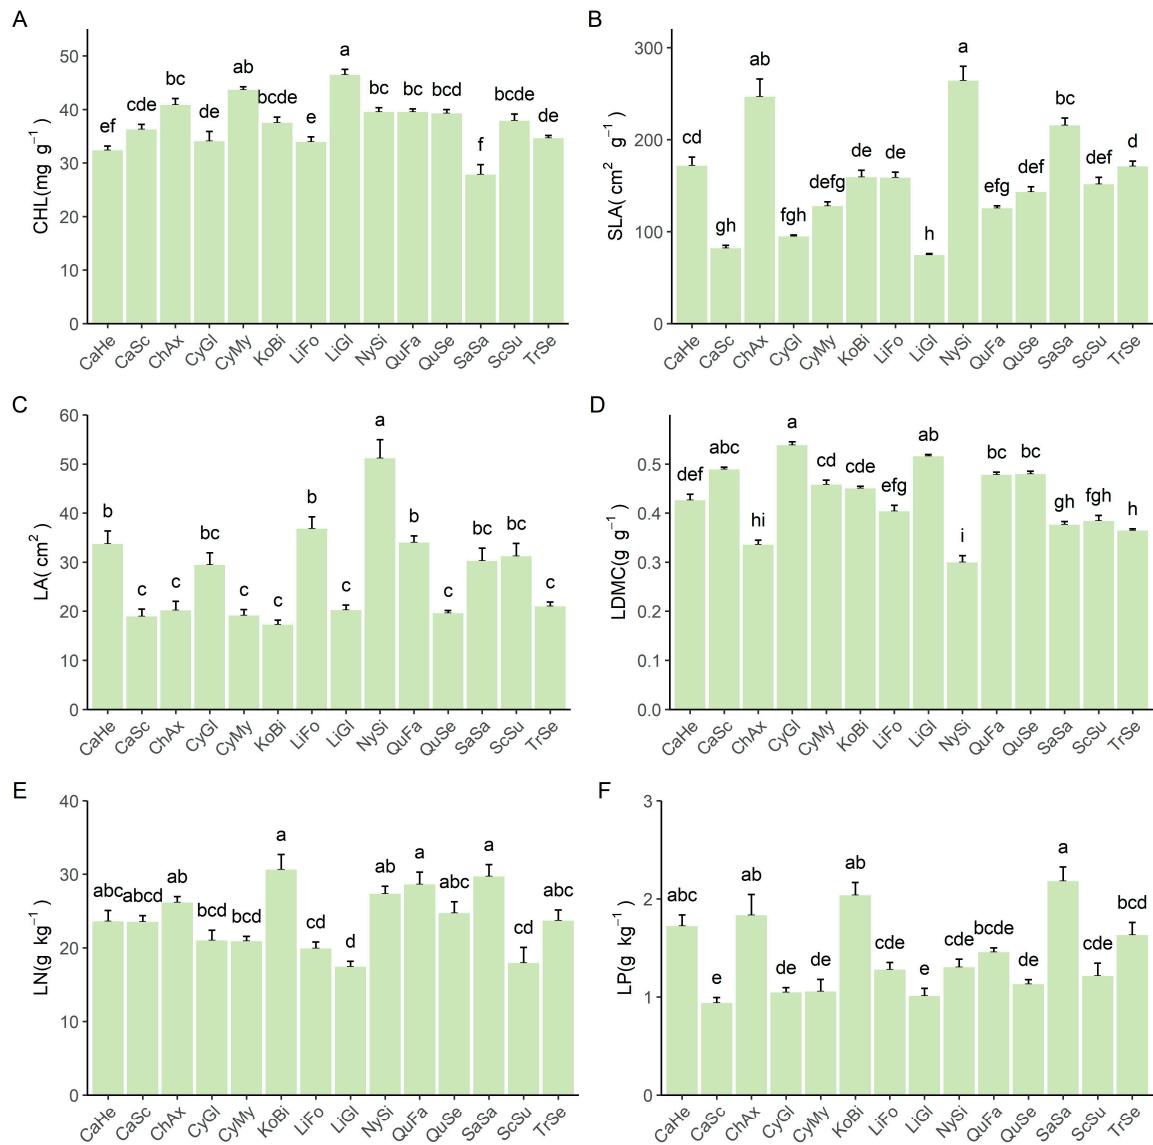

**Figure S1. Variations of leaf traits across different species in monocultures.**

Note: The lowercase letters mean the differences among different species ( $P < 0.05$ ). Chlorophyll (CHL), specific leaf area (SLA), leaf area (LA), leaf dry matter content (LDMC), leaf nitrogen (LN), and leaf phosphorus (LP). *Castanea henryi* (CaHe), *Castanopsis sclerophylla* (CaSc), *Choerospondias axillaris* (ChAx), *Cyclobalanopsis glauca* (CyGl), *Cyclobalanopsis myrsinifolia* (CyMy), *Koelreuteria bipinnata* (KoBi), *Liquidambar formosana* (LiFo), *Lithocarpus glaber* (LiGl), *Nyssa sinensis* (NySi), *Quercus fabri* (QuFa), *Quercus serrata* (QuSe), *Sapindus saponaria* (SaSa), *Schima superba* (ScSu), *Triadica sebifera* (TrSe).

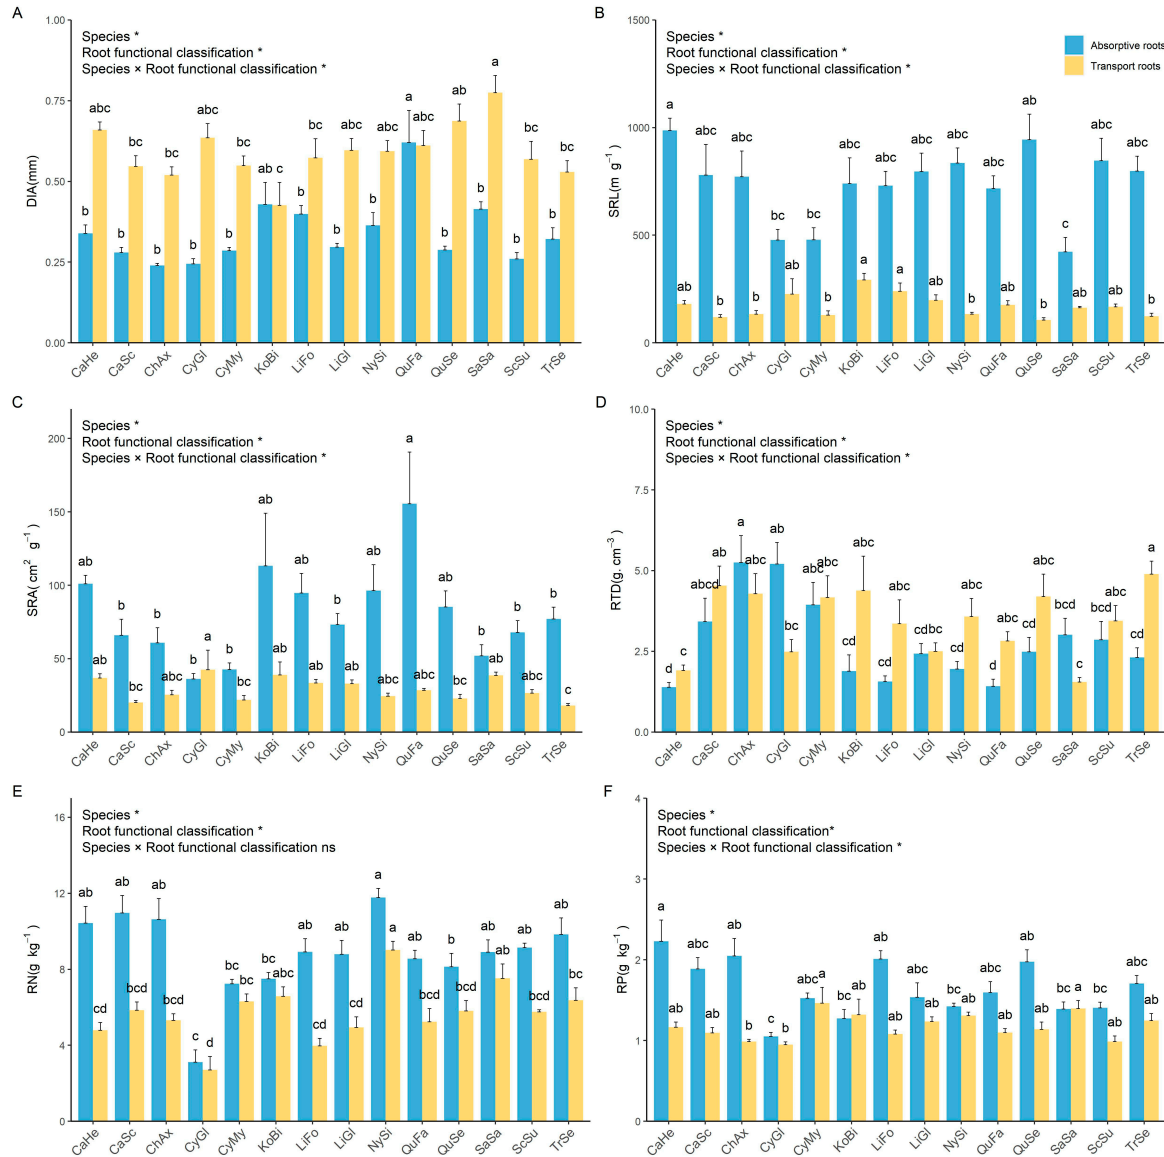

**Figure S2. Variations of fine root traits across different species in monocultures.**

Note: The lowercase letters mean the differences among different species ( $P < 0.05$ ). The lowercase letters mean the differences among different species. The "ns" indicates no significant ( $P > 0.05$ ), whereas the " \* " indicates a significant difference ( $P < 0.05$ ) among different species, root functional classification, and the interactions between species and root functional classification (Tukey's HSD). Root diameter (DIA), specific root length (SRL), specific root surface area (SRA), root tissue density (RTD), root nitrogen (RN), and root phosphorus (RP). *Castanea henryi* (CaHe), *Castanopsis sclerophylla* (CaSc), *Choerospondias axillaris* (ChAx), *Cyclobalanopsis glauca* (CyGl), *Cyclobalanopsis myrsinifolia* (CyMy), *Koelreuteria bipinnata* (KoBi), *Liquidambar formosana* (LiFo), *Lithocarpus glaber* (LiGl), *Nyssa sinensis* (NySi), *Quercus fabri* (QuFa), *Quercus serrata* (QuSe), *Sapindus saponaria* (SaSa), *Schima superba* (ScSu), *Triadica sebifera* (TrSe).

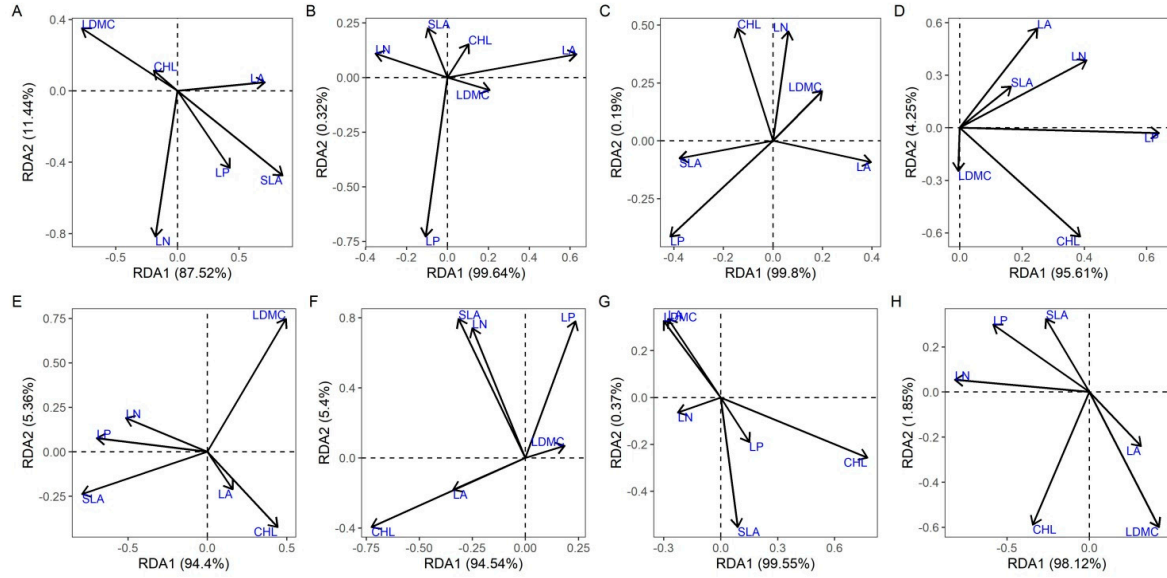

**Figure S3. Redundancy analysis (RDA) about the relationships between leaf traits and root traits in deep-rooted and shallow-rooted species at different species richness.** Note: Deep-rooted species of monocultures (A), 2 (B), 4 (C) and 8 (D) species mixtures; Shallow-rooted species of monocultures (E), 2 (F), 4 (G) and 8 (H) species mixtures. Chlorophyll (CHL), specific leaf area (SLA), leaf area (LA), leaf dry matter content (LDMC), leaf nitrogen (LN), and leaf phosphorus (LP).

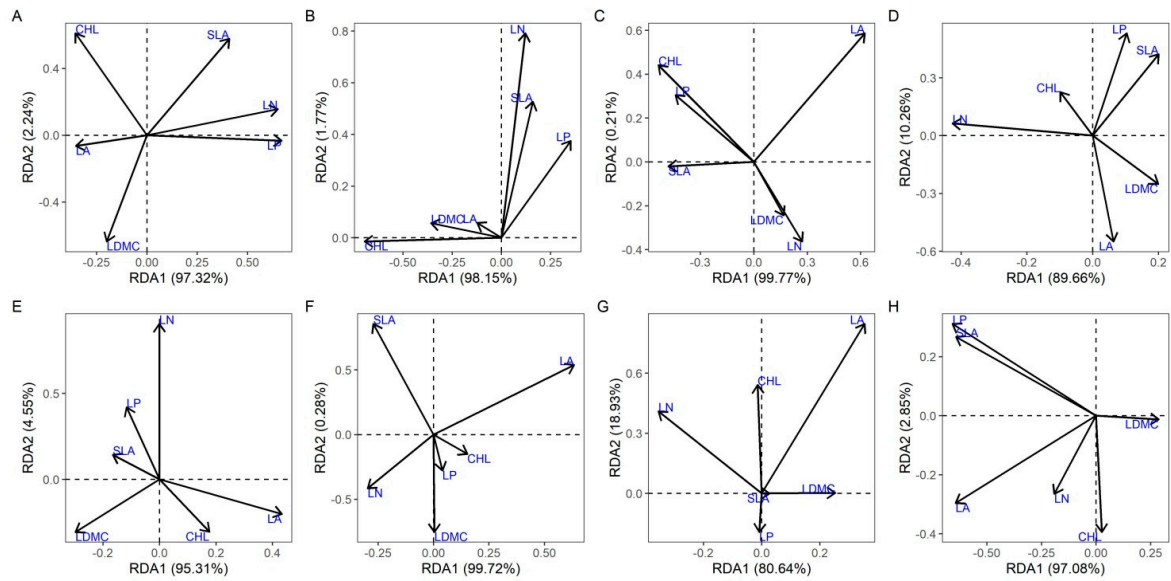

**Figure S4. Redundancy analysis (RDA) about the relationships between leaf traits and root traits in deciduous and evergreen species at different species richness.** Note: Deciduous species of monocultures (A), 2 (B), 4 (C) and 8 (D) species mixtures; Evergreen species of monocultures (E), 2 (F), 4 (G) and 8 (H) species mixtures. Chlorophyll (CHL), specific leaf area (SLA), leaf area (LA), leaf dry matter content (LDMC), leaf nitrogen (LN), and leaf phosphorus (LP).

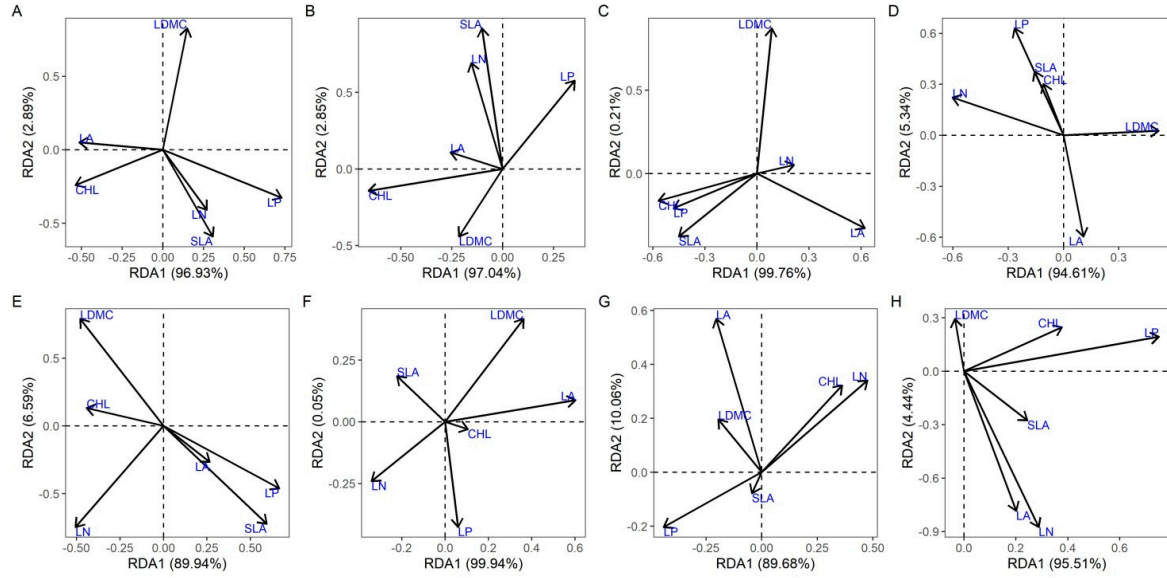

**Figure S5. Redundancy analysis (RDA) about the relationships between leaf traits and root traits in AM and ECM species at different species richness.** Note: AM species of monocultures (A), 2 (B), 4 (C) and 8 (D) species mixtures; ECM species of monocultures (E), 2 (F), 4 (G) and 8 (H) species mixtures. Chlorophyll (CHL), specific leaf area (SLA), leaf area (LA), leaf dry matter content (LDMC), leaf nitrogen (LN), and leaf phosphorus (LP).
